# Supplementary material
Source: PubMed Central journal article supplement (PMC3009794)
Supplement: 1012591108_pnas.201012591SI.pdf [file 1012591108_pnas.201012591SI.pdf]

# Supporting Information

Kracker et al. 10.1073/pnas.1012591108

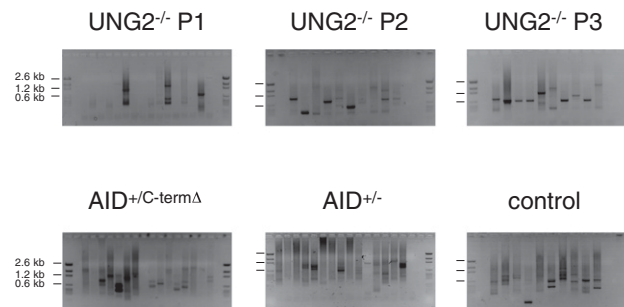

**Fig. S1.** PCR amplification of S $\mu$ -5 $\alpha$  fragments. Shown are representative agarose gels for all UNG2<sup>-/-</sup> patients (with identification numbers corresponding to those in ref. 1) and from one patient each from the AID<sup>+/-</sup>, AID<sup>+/C-termΔ</sup>, and control groups. Molecular weight marker (pGEM; Promega) was loaded on the first lane and last lane of each gel. The sizes of 2.6, 1.2, and 0.6 kb are indicated on the left side of each gel.

1. Imai K, et al. (2003) Human uracil-DNA glycosylase deficiency associated with profoundly impaired immunoglobulin class-switch recombination. *Nat Immunol* 4:1023-1028.

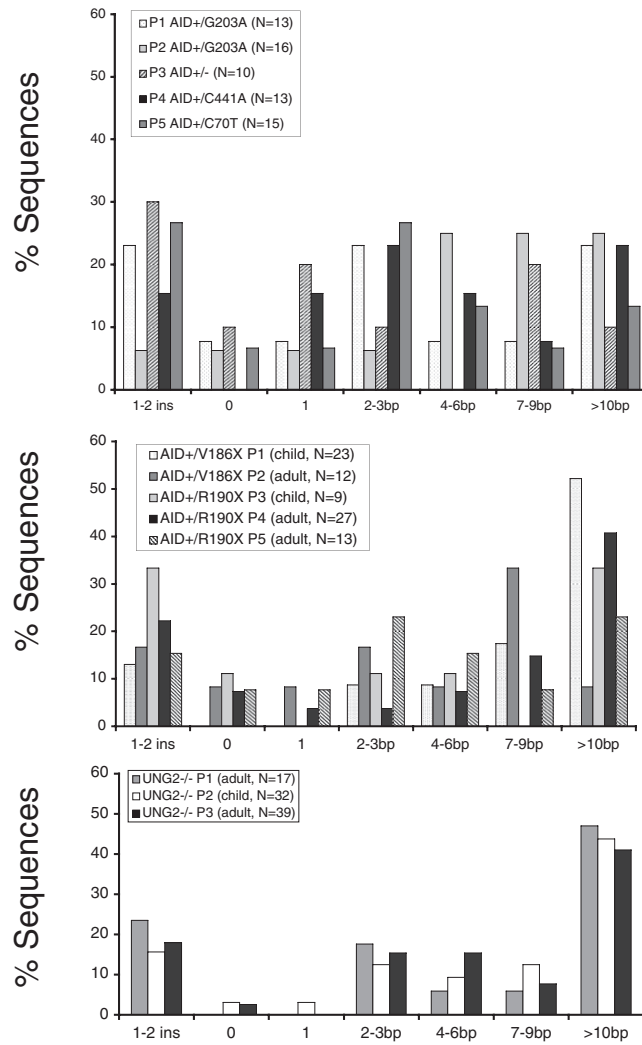

**Fig. S2.** Characterization of S $\mu$ -S $\alpha$  recombination junctions per individual. The bar graphs show perfectly matched microhomology at junctions of PCR products cloned from the indicated patients. (*Top*) S $\mu$ -S $\alpha$  junctions of the AID<sup>+/-</sup> patients. The "–" indicates that in this patient, the complete coding region of the AICDA gene is deleted. (*Middle*) S $\mu$ -S $\alpha$  junctions of the AID<sup>+/-</sup>C-term $\Delta$  patients. (*Bottom*) S $\mu$ -S $\alpha$  junctions of the UNG2<sup>-/-</sup> patients. UNG2<sup>-/-</sup> patient identification numbers correspond to those in ref. 1.
